# Supplementary material for: Status and Influencing Factors of OTC Medicine Use for Self-Medication in Cold and Cough: A Cross- Sectional Survey in Japan
Source: Research Square preprint supplement (doi:10.21203/rs.3.rs-5801515/v1), 2025-04-03
Supplement: Supplementary file 1 [file be46d90e1072feb0955ccd58.pdf]

**Table S1b Translation of the questionnaire (Note: The survey was conducted in Japanese, and this translation is presented to non-Japanese readers.)**

| #                                | Items                                                                                                                                                                                                                                                  | Options and others                                                                                                                                                                                | Type                                                    | Notes for readers |
|----------------------------------|--------------------------------------------------------------------------------------------------------------------------------------------------------------------------------------------------------------------------------------------------------|---------------------------------------------------------------------------------------------------------------------------------------------------------------------------------------------------|---------------------------------------------------------|-------------------|
| -                                | I understand the above explanation and confirm that I am eligible to respond to the survey.                                                                                                                                                            | Checked                                                                                                                                                                                           | check box                                               |                   |
| <b>Part 1. Basic Information</b> |                                                                                                                                                                                                                                                        |                                                                                                                                                                                                   |                                                         |                   |
| 1                                | Sex                                                                                                                                                                                                                                                    | Female, Male, Others                                                                                                                                                                              | check box                                               |                   |
| 2                                | Age                                                                                                                                                                                                                                                    | Text                                                                                                                                                                                              | text box (open-ended question)                          |                   |
| 3                                | Area                                                                                                                                                                                                                                                   | Urban, Non-Urban                                                                                                                                                                                  | check box                                               |                   |
| 4                                | Prefectures                                                                                                                                                                                                                                            | Hokkaido, Tohoku, Kanto, Chubu, Kinki, Chugoku/Shikoku, Kyushu                                                                                                                                    | check box                                               |                   |
| 5                                | Education Level                                                                                                                                                                                                                                        | Below High School Graduation, High School Graduation, Bachelor or above, Master or above                                                                                                          | check box                                               |                   |
| 6                                | Marital Status                                                                                                                                                                                                                                         | Non-married status (single, divorced, widowed), Marital status (married, remarried)                                                                                                               | check box                                               |                   |
| 7                                | Have Children                                                                                                                                                                                                                                          | No, Yes                                                                                                                                                                                           | check box                                               |                   |
| 8                                | Have Medical Insurance (Public medical insurance refers to "Employee Insurance," "National Health Insurance," and "Late-stage Elderly Medical Care System," while private medical insurance refers to insurance provided by insurance companies, etc.) | No; Yes, only public insurance; Yes, only private insurance; Yes, both public and private insurance.                                                                                              | check box                                               |                   |
| 9                                | Have Underlying Disease                                                                                                                                                                                                                                | No, Yes                                                                                                                                                                                           | check box                                               |                   |
| 10                               | Current Self-perceived Health Status                                                                                                                                                                                                                   | Excellent, Very good, Good, Fair, Poor, Very poor                                                                                                                                                 | check box                                               |                   |
| 11                               | Occupation                                                                                                                                                                                                                                             | Students, Company Employers (including self-employed), Part-time Workers (Irregular Work), Pensioners, Unemployed, Others                                                                         | check box and text box (open-ended question) for others |                   |
| 12                               | Have you received formal training in pharmacy at a university or junior college?                                                                                                                                                                       | No; Yes, I am a medical professional; Yes, I am educated but not a medical professional.                                                                                                          | check box                                               |                   |
| 13                               | Do you regularly visit a hospital, clinic, or other medical facility?                                                                                                                                                                                  | No, Yes                                                                                                                                                                                           | check box                                               |                   |
| 14                               | Your household annual income (Japanese Yen/year)?                                                                                                                                                                                                      | Less than 3 million;<br>3 million to less than 5 million;<br>5 million to less than 7 million;<br>7 million to less than 10 million;<br>10 million to less than 15 million;<br>15 million or more | check box                                               |                   |

**Part 2. Please answer the following questions assuming you have a cold or cough.**

- |   |                                                                                                                                                                                            |                                                                                                                                               |           |
|---|--------------------------------------------------------------------------------------------------------------------------------------------------------------------------------------------|-----------------------------------------------------------------------------------------------------------------------------------------------|-----------|
| 1 | When you have a cold or a cough, which of the following do you do first?                                                                                                                   | Visit a hospital/clinic;<br>Use OTC medicine;<br>Perform self-care (e.g., improving diet and exercise);<br>Do nothing and watch the situation | check box |
| 2 | If your cold or cough lasts for more than a week, which of the following do you do?                                                                                                        | Visit a hospital/clinic;<br>Use OTC medicine;<br>Perform self-care (e.g., improving diet and exercise);<br>Do nothing and watch the situation | check box |
| 3 | What do you do first when you are overseas and have a cold or cough? (If you have never done so, you can answer by imagining the situation.)                                               | Visit a hospital/clinic;<br>Use OTC medicine;<br>Perform self-care (e.g., improving diet and exercise);<br>Do nothing and watch the situation | check box |
| 4 | If you use OTC medicine when you have a cold or cough, do you consider other people's recommendations when choosing medicine?                                                              | No, Yes                                                                                                                                       | check box |
| 5 | If you have a cold or cough and use OTC medicine, do you consult medical personnel (e.g., a doctor, pharmacist, nurse, registered salesperson, etc.) when unsure which medicine to choose? | No, Yes                                                                                                                                       | check box |
| 6 | If you have a cold or cough and use OTC medicine, do you consult non-medical personnel (family, friends, etc.) when unsure which medicine to choose?                                       | No, Yes                                                                                                                                       | check box |
| 7 | If you have a cold or cough and use OTC medicine, do you refer to information on the Internet when unsure which medicine to choose?                                                        | No, Yes                                                                                                                                       | check box |
| 8 | If you use OTC medicine, do you strictly follow the dosage and usage instructions listed in the medicine's instructions?                                                                   | No, Yes                                                                                                                                       | check box |
| 9 | Do you know that OTC medicines (including cold medicines) have expiration dates?                                                                                                           | No, Yes                                                                                                                                       | check box |

**Part 3. Please select the most appropriate answer from "1. Disagree strongly" to "7. Agree Strongly" regarding the extent to which each of the statements from 1 to 10 above applies**

*I see*

*myself as:*

|                                     |                                             |           |
|-------------------------------------|---------------------------------------------|-----------|
| 1 Extraverted, enthusiastic.        | 1 (Disagree strongly) to 7 (Agree Strongly) | check box |
| 2 Critical, quarrelsome.            | 1 (Disagree strongly) to 7 (Agree Strongly) | check box |
| 3 Dependable, self-disciplined.     | 1 (Disagree strongly) to 7 (Agree Strongly) | check box |
| 4 Anxious, easily upset.            | 1 (Disagree strongly) to 7 (Agree Strongly) | check box |
| 5 Open to new experiences, complex. | 1 (Disagree strongly) to 7 (Agree Strongly) | check box |
| 6 Reserved, quiet.                  | 1 (Disagree strongly) to 7 (Agree Strongly) | check box |
| 7 Sympathetic, warm.                | 1 (Disagree strongly) to 7 (Agree Strongly) | check box |
| 8 Disorganized, careless.           | 1 (Disagree strongly) to 7 (Agree Strongly) | check box |
| 9 Calm, emotionally stable.         | 1 (Disagree strongly) to 7 (Agree Strongly) | check box |
| 10 Conventional, uncreative.        | 1 (Disagree strongly) to 7 (Agree Strongly) | check box |

The left is the English version of TIPI.  
However, in this survey, we used the  
Japanese translation reported by Oshio et  
al. (See detailed information in  
eMethod.)

**Part 4. How often do you use media and social networking services for the purposes listed below? Please choose the most appropriate answer from "1. Never Used" to "5. Always Used."**

|                                                           |                                   |           |
|-----------------------------------------------------------|-----------------------------------|-----------|
| 1 Social communication.                                   | 1 (Never Used) to 5 (Always Used) | check box |
| 2 Self presentation.                                      | 1 (Never Used) to 5 (Always Used) | check box |
| 3 Social action (such as advocacy and promoting justice). | 1 (Never Used) to 5 (Always Used) | check box |
| 4 Leisure and entertainment.                              | 1 (Never Used) to 5 (Always Used) | check box |
| 5 Information acquisition through media.                  | 1 (Never Used) to 5 (Always Used) | check box |
| 6 Commercial transactions.                                | 1 (Never Used) to 5 (Always Used) | check box |

Media Use Scale:  
In this survey, we translated this scale into  
Japanese and used it.(See detailed  
information in eMethod.)

**Part 5. We would like to hear your opinions and experiences using the Internet to get health information. For each statement, please tell us the answer that best describes your current**

- |                                                                                               |                                             |           |
|-----------------------------------------------------------------------------------------------|---------------------------------------------|-----------|
| 1 I know what health resources are available on the Internet.                                 | 1 (Strongly disagree) to 5 (Strongly agree) | check box |
| 2 I know where to find helpful health resources on the Internet.                              | 1 (Strongly disagree) to 5 (Strongly agree) | check box |
| 3 I know how to find helpful health resources on the Internet.                                | 1 (Strongly disagree) to 5 (Strongly agree) | check box |
| 4 I know how to use the Internet to answer my questions about health.                         | 1 (Strongly disagree) to 5 (Strongly agree) | check box |
| 5 I know how to use the health information I find on the Internet to help me.                 | 1 (Strongly disagree) to 5 (Strongly agree) | check box |
| 6 I have the skills I need to evaluate the health resources I find on the Internet.           | 1 (Strongly disagree) to 5 (Strongly agree) | check box |
| 7 I can tell high quality health resources from low quality health resources on the Internet. | 1 (Strongly disagree) to 5 (Strongly agree) | check box |
| 8 I feel confident in using information from the Internet to make health decisions.           | 1 (Strongly disagree) to 5 (Strongly agree) | check box |

eHEALS:

The Japanese version was reported by Mitsutake et al. (See detailed information in eMethod.)

**Part 6. Think about yourself and your life in general as you answer the following questions. How confident are you about each question? Using a scale of 1 to 4, choose the number that best describes you ("1. Not at all confident" to "5. Exactly confident.").**

- |                                                                                         |                                                   |           |
|-----------------------------------------------------------------------------------------|---------------------------------------------------|-----------|
| 1 I can always manage to solve difficult problems if I try hard enough.                 | 1 (Not at all confident) to 5 (Exactly confident) | check box |
| 2 If someone opposes me, I can find the means and ways to get what I want.              | 1 (Not at all confident) to 5 (Exactly confident) | check box |
| 3 It is easy for me to stick to my aims and accomplish my goals.                        | 1 (Not at all confident) to 5 (Exactly confident) | check box |
| 4 I am confident that I could deal efficiently with unexpected events.                  | 1 (Not at all confident) to 5 (Exactly confident) | check box |
| 5 Thanks to my resourcefulness, I know how to handle unforeseen situations.             | 1 (Not at all confident) to 5 (Exactly confident) | check box |
| 6 I can solve most problems if I invest the necessary effort.                           | 1 (Not at all confident) to 5 (Exactly confident) | check box |
| 7 I can remain calm when facing difficulties because I can rely on my coping abilities. | 1 (Not at all confident) to 5 (Exactly confident) | check box |
| 8 When I am confronted with a problem, I can usually find several solutions.            | 1 (Not at all confident) to 5 (Exactly confident) | check box |
| 9 If I am in trouble, I can usually think of a solution.                                | 1 (Not at all confident) to 5 (Exactly confident) | check box |
| 10 I can usually handle whatever comes my way.                                          | 1 (Not at all confident) to 5 (Exactly confident) | check box |

GSE Scale:

The left is the English version. However, in this survey, we used the Japanese version, which can be found at [<https://userpage.fu-berlin.de/%7Ehealth/japan.htm>] (See detailed information in eMethod.)
