# Supplementary material for: Status and Influencing Factors of OTC Medicine Use for Self-Medication in Cold and Cough: A Cross- Sectional Survey in Japan
Source: Research Square preprint supplement (doi:10.21203/rs.3.rs-5801515/v1), 2025-04-03
Supplement: Supplementary file 1 [file f24e8ca42467c4d11b80f9a0.docx]

**Supplemental Information**

1. **Results of Instrument Validation in Detail**

The reliability and validity of all scales above were qualified using factor analysis before being used as indicators.

Validations of TIPI-J, JGSE, eHEALS, and MUS were conducted using our data. We confirmed the comparative fit index (CFI) and Tucker-Lewis Index (TLI) for each instrument using confirmatory factor analysis. JGSE and eHEALS showed reliability with CFI = 0.97, 0.88 and TLI = 0.96, 0.83 (**Table S2**), indicating good fitness and acceptableness. Using exploratory factor analysis, JGSE and eHEALS exhibited a single-factor structure with Cronbach’s α coefficients of 0.94 and 0.92.

For TIPI-J, as it is well known as a five-factor structure, we confirmed that our data formed five factors: Extraversion (correlation efficient between two constructive items: -0.47), Agreeableness (-0.38), Conscientiousness (-0.57), Neuroticism (-0.53), and Openness (-0.48) (**Table S3a**). The results are similar to the original report on this instrument by Oshio et al. 1. Furthermore, Cronbach’s α coefficient of each dimension was as follows: Extraversion (0.64), Agreeableness (0.55), Conscientiousness (0.72), Neuroticism (0.69), and Openness (0.65). Because there are two items for each dimension and all the α coefficients higher than 0.5, we considered that the TIPI-J had favorable reliability for our data. The data distributions and inter-factor correlation matrix were also calculated (**Tables S3b and S3c**).

However, for MUS, CFI was 0.76, and TLI was 0.61, much lower than the acceptable value range of 0.90 to 0.95. Cronbach’s coefficient for MUS was 0.68, and we failed to obtain a good single-factor structure. Even changing the number of factors did not produce acceptable models (Data not shown). One of the reasons may be that although this instrument had been evaluated in the previous study, the development of this instrument was based on Chinese citizens. Whether this scale can be applied *per se* has not been investigated. The differences between Japanese and Chinese media use may cause this instrument not to work well in this study. Thus, for further analysis, we used the questions of MUS as independent variables and did not sum up the values of the items.

**References**

1. Oshio A, Abe S, Cutrone P. Development, Reliability, and Validity of the Japanese Version of Ten Item Personality Inventory (TIPI-J). *The Japanese Journal of Personality*. 2012;21(1):40-52. doi:10.2132/personality.21.40

1. **Supplemental Tables and Figures**

**Table S1a Questionnaire (in Japanese) (See PDF file)**

**Table S1b Questionnaire contents (in English, translated from Japanese) (See PDF file)**

**Table S2 Validation for instruments**

|  | **Confirmatory Factor Analysis** | | **Exploratory Factor Analysis** | |
| --- | --- | --- | --- | --- |
|  | **CFI** | **TLI** | **# of factors** | **Cronbach’s α coefficient** |
| **TIPI-J** | 0.84 | 0.71 | 5 | - |
| ***Extraversion*** | Not Calc. | Not Calc. | 1 | 0.64 |
| ***Agreeableness*** | Not Calc. | Not Calc. | 1 | 0.55 |
| ***Conscientiousness*** | Not Calc. | Not Calc. | 1 | 0.72 |
| ***Neuroticism*** | Not Calc. | Not Calc. | 1 | 0.69 |
| ***Openness*** | Not Calc. | Not Calc. | 1 | 0.65 |
| **JGSE** | 0.97 | 0.96 | 1 | 0.94 |
| **eHEALS** | 0.88 | 0.83 | 1 | 0.92 |
| **MUS** | 0.76 | 0.61 | 1 | 0.68 |
| CFI: comparative fit index, TLI: Tucker-Lewis Index | | |  |  |

**Table S3 Validations for TIPI-J**

1. **Correlation between corresponding items of TIPI-J and range, average, and SD of other correlation coefficients**

|  | **Correlation coefficient** | | | | **Mean** | **SD** |
| --- | --- | --- | --- | --- | --- | --- |
|  |  |  | **Other Items** | |
|  | **Corresponding Items** | ***p*** | **min** | **max** |
| **Extraversion** |  |  |  |  |  |  |
| **TIPI-J_1** | -0.47 | *** | -0.44 | 0.38 | 3.29 | 1.61 |
| **TIPI-J_6** |  |  | -0.24 | 0.3 | 4.35 | 1.53 |
| **Agreeableness** |  |  |  |  |  |  |
| **TIPI-J_2** | -0.38 | *** | -0.41 | 0.34 | 2.75 | 1.45 |
| **TIPI-J_7** |  |  | -0.33 | 0.42 | 4.54 | 1.32 |
| **Conscientiousness** | |  |  |  |  |  |
| **TIPI-J_3** | -0.57 | ** | -0.31 | 0.42 | 3.79 | 1.49 |
| **TIPI-J_8** |  |  | -0.41 | 0.39 | 3.97 | 1.68 |
| **Neuroticism** |  |  |  |  |  |  |
| **TIPI-J_4** | -0.53 | *** | -0.44 | 0.39 | 4.77 | 1.67 |
| **TIPI-J_9** |  |  | -0.41 | 0.4 | 4.12 | 1.47 |
| **Openness** |  |  |  |  |  |  |
| **TIPI-J_5** | -0.48 | *** | -0.24 | 0.38 | 3.9 | 1.5 |
| **TIPI-J_10** |  |  | -0.43 | 0.35 | 4.51 | 1.59 |
| ****p* < 0.001, ***p* < 0.05 | | | | | | |

1. **Representative values of TIPI-J and dispersion degree**

|  | **Mean** | **SE** | **CI_l** | **CI_u** | **SD** | **skew** | **kurtosis** |
| --- | --- | --- | --- | --- | --- | --- | --- |
| **Extraversion** | 6.94 | 0.08 | 6.78 | 7.1 | 2.7 | 0.27 | -0.54 |
| **Agreeableness** | 9.79 | 0.07 | 9.65 | 9.93 | 2.3 | -0.69 | 0.52 |
| **Conscientiousness** | 7.82 | 0.09 | 7.65 | 7.99 | 2.8 | -0.03 | -0.55 |
| **Neuroticism** | 8.64 | 0.08 | 8.48 | 8.81 | 2.75 | -0.22 | -0.45 |
| **Openness** | 7.4 | 0.08 | 7.24 | 7.56 | 2.65 | 0.03 | -0.41 |

1. **Correlation Matrix**

|  | **Extraversion** | **Agreeableness** | **Conscientiousness** | **Neuroticism** | **Openness** |
| --- | --- | --- | --- | --- | --- |
| **Extraversion** |  | 0.11 | 0.25 | -0.35 | 0.46 |
| **Agreeableness** |  |  | 0.43 | -0.39 | 0.11 |
| **Conscientiousness** |  |  |  | -0.49 | 0.24 |
| **Neuroticism** |  |  |  |  | -0.31 |
| **Openness** |  |  |  |  |  |

**Table S4 List of** **response and explanatory variables**

| **#** | **Response variable** | **Explanatory variables** | | |
| --- | --- | --- | --- | --- |
| **Entire model** | **Subgroup model** | **Sensitivity analysis model** |
| 1 | Seeking or not seeking healthcare even after one week of cold and cough symptoms (1: Seeking, 0: Not seeking) | Age, Area, Education, Marital Status, Kind of Insurance, Regularly Visit A Doctor, Extraversion (TIPI-J), Agreeableness (TIPI-J) | Age, Marital Status, Kind of Insurance, Agreeableness (TIPI-J) | Not Conducted |
| 2 | Strictly following the dosage instructions (1: Yes, 0: No) | Age, Have A Child/Children, Have Pharmaceutical Science Related Training, Commercial Transactions (MUS), Agreeableness (TIPI-J), Conscientiousness (TIPI-J) | Age, Have A Child/Children, Conscientiousness (TIPI-J) | Not Conducted |
| 3 | Awareness of expiration dates (1: Yes, 0: No) | Sex, Age, Area, Perceived Health, Regularly Visit A Doctor, Social Action (MUS), eHEALS | Sex, Age, Area, Perceived Health, Occupation, Leisure (MUS), eHEALS | Sex, Age, Area, Perceived Health, Social Action (MUS), eHEALS |
| 4 | Consulting medical personnel (1: Yes, 0: No) | Sex, Age, Education, Kind of Insurance, Regularly Visit A Doctor, Social Action (MUS), Extraversion (TIPI-J), Agreeableness (TIPI-J) | Sex, Kind of Insurance, Communication (MUS), Agreeableness (TIPI-J), JGSE | Not Conducted |
| 5 | Referring internet information (1: Yes, 0: No) | Sex, Have Pharmaceutical Science Related Training, Neuroticism (TIPI-J), eHEALS | Area, Neuroticism (TIPI-J), eHEALS | Not Conducted |
