# Supplementary material for: Status and Influencing Factors of OTC Medicine Use for Self-Medication in Cold and Cough: A Cross- Sectional Survey in Japan
Source: Research Square preprint supplement (doi:10.21203/rs.3.rs-5801515/v1), 2025-04-03
Supplement: Supplementary file 2 [file cc9ecf99f6afc6fc6b04f915.pdf]

# 市民の医療選択傾向に関する調査

このアンケート調査は、18歳以上の日本人を対象に、皆様の一般用医薬品の使用状況と性格等の関係を分析する目的として実施するものです。

本アンケートには、Part 1～6 から構成しており、計58問があります。回答にかかる時間はおよそ10分です。

この調査への参加、あるいは不参加によりあなたが不利益をこうむることは一切ありません。

アンケートに御回答頂いた方に、CrowdWorksを経由で、薄謝（220円(お支払いの際、この金額からクラウドワークスのシステム手数料として20%が引かれます)）をお支払います。ただし、最後まで回答しなかった場合は謝礼をお支払いいたしません。

回答の提出をもって、本研究への参加の同意を頂いたものとして扱わせて頂きます。この調査の結果は個人を特定しない形で学会発表や学術論文として公表する予定です。

## 【注意事項】

- 本アンケートは日本国籍を有する18歳以上の方が対象です。
- アンケートの中のすべての項目にお回答していただきます。お考えをありのままにお聞かせ下さい。選択肢の中に、あなたのお考えに一番近いものを選んでください。
- 途中でアンケートへの参加を中止したい場合にはブラウザを閉じてください。ただしこの場合、謝金はお支払いできませんのでご了承ください。
- 本アンケートは、回答送信後は原則回答の削除ができませんが、回答者が、回答撤回の意思を表明し、回答を特定できる終了IDを研究チームに正しく提供した場合、研究チーム側で回答を特定し削除できる可能性があります。ただしこの場合、謝金の返金をお願いする場合がございますのでご了承ください。

皆様の回答をお待ちしております。よろしくお願いします。

## 調査実施者

大阪大学大学院薬学研究科 田 雨時、幡生 あすか  
神戸学院大学心理学部 毛 新華

## お問い合わせ先 (調査実施代表者)

大阪大学大学院薬学研究科 田雨時

TEL:06-6879-8242

EMAIL: yushi-tian@phs.osaka-u.ac.jp

(本研究は大阪大学大学院薬学研究科・薬学部臨床研究倫理審査委員会の承認を得て実施します。)

\* 必須の質問です

---

1。 参加の同意確認 \*

当てはまるものをすべて選択してください。

☐ 私は上記の説明を理解し、アンケートの回答対象者である事を確認しました。

Part 1. 基本情報

2。 1. 性別 \*

1つだけマークしてください。

☐ 女性

☐ 男性

☐ その他

3。 2. 年齢 \*

---

4。 3. 居住地域1 \*

1つだけマークしてください。

☐ 都会

☐ 非都会

5. 4. 居住地域2 \*

1つだけマークしてください。

- ☐ 北海道
- ☐ 東北
- ☐ 関東
- ☐ 中部
- ☐ 近畿
- ☐ 中国・四国
- ☐ 九州

6. 5. 最終学歴 \*

1つだけマークしてください。

- ☐ 中学校卒以下
- ☐ 高卒または専門学校卒
- ☐ 大学（短大・高専）卒以上
- ☐ 大学院（6年制大学含む）以上

7. 6. 婚姻状況 \*

1つだけマークしてください。

- ☐ 非既婚状態（独身、離婚、未亡人）
- ☐ 既婚状態（既婚、再婚）

8. 7. 子供の有無 \*

1つだけマークしてください。

- ☐ いいえ
- ☐ はい

- 9。 8. 医療保険の有無（公的医療保険は、「被用者保険」「国民健康保険」「後 \*  
期高齢者医療制度」を指し、民間医療保険は、保険会社等の保険を指す。）

1つだけマークしてください。

- ☐ いいえ、加入していない
- ☐ はい、私は公的医療保険のみに加入している
- ☐ はい、私は民間医療保険のみに加入している
- ☐ はい、私は公的医療保険と民間医療保険の両方に加入している

- 10。 9. 基礎疾患の有無 \*

1つだけマークしてください。

- ☐ いいえ
- ☐ はい

- 11。 10. 現在の自覚の健康状態 \*

1つだけマークしてください。

- ☐ 優れている
- ☐ とても良い
- ☐ 良い
- ☐ まあまあ
- ☐ 良くない
- ☐ とても良くない

12。 11. 職業 \*

1つだけマークしてください。

- ☐ 学生
- ☐ 会社員 (自営業を含む)
- ☐ アルバイト (不定期的な仕事)
- ☐ 年金生活者 (退職者)
- ☐ 無職
- ☐ その他: \_\_\_\_\_

13。 12. 大学や短期大学などで、正式に薬学に関する教育を受けたことがありますか？ \*

1つだけマークしてください。

- ☐ いいえ。
- ☐ はい、医療関係者です。
- ☐ はい、受けたことがあるが、医療関係者ではありません。

14。 13. 定期的な通院 (病院・診療所・クリニック) の有無 \*

1つだけマークしてください。

- ☐ いいえ
- ☐ はい

15. 14. あなたの世帯年収(円/年) \*

1つだけマークしてください。

- ☐ 300万未満
- ☐ 300万~500万未満
- ☐ 500万~700万未満
- ☐ 700万~1000万未満
- ☐ 1000万~1500万未満
- ☐ 1500万以上

## Part 2.

風邪を引いた状態または咳が出る状態を想定して、以下の問題をお答えください。

16. 1. 風邪または咳の時、まず行うことは以下のどれですか？ \*

1つだけマークしてください。

- ☐ セルフケア(食事・運動の工夫など)を行う
- ☐ 市販の薬を使う
- ☐ 病院・診療所を受診する
- ☐ 何もせず様子を見る

17. 2. 風邪または咳が一週間以上続く場合、あなたが行うことは以下のどれですか？ \*

1つだけマークしてください。

- ☐ セルフケア(食事・運動の工夫など)を行う
- ☐ 市販の薬を使う
- ☐ 病院・診療所を受診する
- ☐ 何もせず様子を見る

18. 3. **海外滞在中**、風邪または咳の時、まず行うことは以下のどれですか？ \*  
(行ったことがない場合状況を想像して回答で結構です。)
- 1つだけマークしてください。
- ☐ セルフケア(食事・運動の工夫など)を行う
- ☐ 市販の薬を使う
- ☐ 病院・診療所を受診する
- ☐ 何もせず様子を見る
19. 4. 風邪や咳の症状がある場合、市販の薬を使う際、どの薬を使用するかに対して、**他人の推薦**を重視しますか？ \*
- 1つだけマークしてください。
- ☐ いいえ
- ☐ はい
20. 5. 風邪や咳の症状がある場合、市販の薬を使う際に選択に迷った場合、医師や薬剤師、看護師、登録販売者などの**医療関係者に相談**しますか？ \*
- 1つだけマークしてください。
- ☐ いいえ
- ☐ はい
21. 6. 風邪や咳の症状がある場合、市販の薬を使う際に選択に迷ったとき、家族や友人などの**非医療関係者に相談**しますか？ \*
- 1つだけマークしてください。
- ☐ いいえ
- ☐ はい

22. 7. 風邪や咳の症状がある場合、市販の薬を使う際に選択に迷った場合、**インターネット情報**を参照しますか？ **1** \*

1つだけマークしてください。

☐ いいえ☐ はい

23. 8. 風邪や咳の症状がある場合、市販の薬を使う際、薬の説明書に記載されている用量や用法を**厳密**に守って服用しますか？ \*

1つだけマークしてください。

☐ いいえ☐ はい

24. 9. あなたは、（風邪薬を含む）市販の薬には**使用期限**があることは知っていますか？ \*

1つだけマークしてください。

☐ いいえ☐ はい

### Part 3.

下記の1から10までのことばがあなた自身にどのくらい当てはまるかについて、「1. 全く違うと思う」から「7. 強くそう思う」のうちもっとも適切なものを選択してください。

25. 1. 活発、外向的だと思う。 \*

1つだけマークしてください。

1      2      3      4      5      6      7

全く違うと思う ○ ○ ○ ○ ○ ○ ○ 強くそう思う



26. 2. 他人に不満をもち、もめごとを起こしやすいと思う。 \*

1つだけマークしてください。

1      2      3      4      5      6      7

全く違うと思う ○ ○ ○ ○ ○ ○ ○ 強くそう思う

27. 3. しっかりしていて、自分に厳しいと思う。 \*

1つだけマークしてください。

1      2      3      4      5      6      7

全く違うと思う ○ ○ ○ ○ ○ ○ ○ 強くそう思う

28. 4. 心配性で、うろたえやすいと思う。 \*

1つだけマークしてください。

1      2      3      4      5      6      7

全く違うと思う ○ ○ ○ ○ ○ ○ ○ 強くそう思う

29. 5. 新しいことが好きで、変わった考えをもつと思う。 \*

1つだけマークしてください。

1      2      3      4      5      6      7

全く違うと思う ○ ○ ○ ○ ○ ○ ○ 強くそう思う

30. 6. ひかえめで、おとなしいと思う。 \*

1つだけマークしてください。

1      2      3      4      5      6      7

全く違うと思う ○ ○ ○ ○ ○ ○ ○ 強くそう思う

31. 7. 人に気をつかう、やさしい人間だと思う。 \*

1つだけマークしてください。

1      2      3      4      5      6      7

全く違うと思う ○ ○ ○ ○ ○ ○ ○ 強くそう思う

32. 8. だらしなく、うっかりしていると思う。 \*

1つだけマークしてください。

1      2      3      4      5      6      7

全く違うと思う ○ ○ ○ ○ ○ ○ ○ 強くそう思う

33. 9. 冷静で、気分が安定していると思う。 \*

1つだけマークしてください。

1      2      3      4      5      6      7

全く違うと思う ○ ○ ○ ○ ○ ○ ○ 強くそう思う

34。 10. 発想力に欠けた、平凡な人間だと思う。 \*

1つだけマークしてください。

1 2 3 4 5 6 7

全く違うと思う ☐ ☐ ☐ ☐ ☐ ☐ ☐ 強くそう思う

#### Part 4.

あなたの下記の1から6までの目的でのメディアとソーシャル・ネットワーキング・サービスの利用頻度を教えてください。「1. 使ったことがない」から「5. いつも使っている」のうちもっとも適切なものを選択してください。

35。 1. 対人的（あるいは他者との）コミュニケーション \*

1つだけマークしてください。

1 2 3 4 5

使ったことがない ☐ ☐ ☐ ☐ ☐ いつも使っている

36。 2. 自己表現 \*

1つだけマークしてください。

1 2 3 4 5

使ったことがない ☐ ☐ ☐ ☐ ☐ いつも使っている

37。 3. 社会的行動（提唱や正義の促進など） \*

1つだけマークしてください。

1 2 3 4 5

使ったことがない ☐ ☐ ☐ ☐ ☐ いつも使っている

38。 4. レジャーとエンターテイメント \*

1つだけマークしてください。

1 2 3 4 5

使ったことがない ☐ ☐ ☐ ☐ ☐ いつも使っている

39。 5. メディアを通じた情報取得 \*

1つだけマークしてください。

1 2 3 4 5

使ったことがない ☐ ☐ ☐ ☐ ☐ いつも使っている

40。 6. 商取引 \*

1つだけマークしてください。

1 2 3 4 5

使ったことがない ☐ ☐ ☐ ☐ ☐ いつも使っている

Part 5.

あなたの意見やインターネットを利用して健康情報を得る経験についてお聞きしたいと思います。各記述文について、現在のあなたの意見や経験を最もよく表す回答をお知らせください。

41。 1. 私は、インターネットでどのような健康情報サイトが利用できるかを知っている。 \*

1つだけマークしてください。

1 2 3 4 5

全くそう思わない ☐ ☐ ☐ ☐ ☐ 強くそう思う

42。 2. 私は、インターネット上のどこに役立つ健康情報があるかを知っている。 \*

1つだけマークしてください。

1 2 3 4 5

全くそう思わない ☐ ☐ ☐ ☐ ☐ 強くそう思う

43。 3. 私は、インターネット上で役立つ健康情報サイトの見つけ方を知っている。 \*

1つだけマークしてください。

1 2 3 4 5

全くそう思わない ☐ ☐ ☐ ☐ ☐ 強くそう思う

44。 4. 私は、自分自身の健康状態についての疑問を解決するために、どのようにインターネットを使用すればよいかを知っている。 \*

1つだけマークしてください。

1 2 3 4 5

全くそう思わない ☐ ☐ ☐ ☐ ☐ 強くそう思う

45。 5. 私は、インターネット上で見つけた健康情報の活用方法を知っている。 \*

1つだけマークしてください。

1 2 3 4 5

全くそう思わない ☐ ☐ ☐ ☐ ☐ 強くそう思う

46. 6. 私は、インターネット上で見つけた健康情報サイトを評価することができ \*
- るスキルがある。

1つだけマークしてください。

1 2 3 4 5

全くそう思わない ☐ ☐ ☐ ☐ ☐ 強くそう思う

47. 7. 私は、インターネット上の質の高い健康情報サイトと質の低い健康情報サ \*
- イトを見分けることができる。

1つだけマークしてください。

1 2 3 4 5

全くそう思わない ☐ ☐ ☐ ☐ ☐ 強くそう思う

48. 8. 私は、健康状態について判断する際に、インターネットからの情報を活用 \*
- する自信がある。

1つだけマークしてください。

1 2 3 4 5

全くそう思わない ☐ ☐ ☐ ☐ ☐ 強くそう思う

## Part 6.

以下の質問に答える際は、自分自身と自分の人生全般を考えてください。それぞれの質問について、あなたはどの程度自信がありますか？ 1から4の尺度を用いて、最もよくあてはまる数字を選んでください。（1. 全く自信がない ～ 4. 非常に自信がある）

49。 1. 私は、一生懸命がんばれば、困難な問題でもいつも解決することができる \*

1つだけマークしてください。

1   2   3   4

全く自信がない ☐ ☐ ☐ ☐ 非常に自信がある

50。 2. 私は、誰かが私に反対しても、自分が欲しいものを手にするための手段や道を探ることができる \*

1つだけマークしてください。

1   2   3   4

全く自信がない ☐ ☐ ☐ ☐ 非常に自信がある

51。 3. 目的を見失わず、ゴールを達成することは私にとって難しいことではない \*

1つだけマークしてください。

1   2   3   4

全く自信がない ☐ ☐ ☐ ☐ 非常に自信がある

52。 4. 予期せぬ出来事に遭遇しても、私は効率よく対処できる自信がある \*

1つだけマークしてください。

1   2   3   4

全く自信がない ☐ ☐ ☐ ☐ 非常に自信がある

53. 5. 私は色々な才略に長けているので、思いがけない場面に出くわしても、どうやってきりぬければよいのか分かる \*

1つだけマークしてください。

1 2 3 4

全く自信がない ☐ ☐ ☐ ☐ 非常に自信がある

54. 6. 必要な努力さえ惜しまなければ、私はだいたいの問題を解決することができる \*

1つだけマークしてください。

1 2 3 4

全く自信がない ☐ ☐ ☐ ☐ 非常に自信がある

55. 7. 自分の物事に対処する能力を信じているので、困難なことに立ち向かっても取り乱したりしない \*

1つだけマークしてください。

1 2 3 4

全く自信がない ☐ ☐ ☐ ☐ 非常に自信がある

56. 8. 問題に直面しても、いつもいくつかの解決策を見つけることができる \*

1つだけマークしてください。

1 2 3 4

全く自信がない ☐ ☐ ☐ ☐ 非常に自信がある



57。 9. 苦境に陥っても、いつも解決策を考えつく \*

1つだけマークしてください。

1 2 3 4

全く自信がない ☐ ☐ ☐ ☐ 非常に自信がある

58。 10. どんなことが起ころうとも、私はいつもその事に対処することができる \*

1つだけマークしてください。

1 2 3 4

全く自信がない ☐ ☐ ☐ ☐ 非常に自信がある
